# Supplementary material for: A theoretical study on the electronic and photophysical properties of two series of iridium(iii) complexes with different substituted N^N ligand
Source: Royal Society of Chemistry journal article supplement (doi:10.1039/c6ra27631h), 2017-01-01
Supplement: c6ra27631h1.pdf [file c6ra27631h1.pdf]

## Supporting Information

### **A theoretical study on the electronic and photophysical properties of two series of iridium(III) complexes with different substituted N<sup>N</sup> ligand†**

Xiaohong Shang,<sup>\*a</sup> Deming Han,<sup>b</sup> Mei Liu<sup>a</sup> and Gang Zhang<sup>c</sup>

<sup>a</sup> *College of Chemistry and Life Science, Changchun University of Technology, Changchun 130012, P.R. China. E-mail: shangxiaohong58@aliyun.com; Tel: +86 186 8650 7982*

<sup>b</sup> *School of Life Science and Technology, Changchun University of Science and Technology, Changchun 130022, P.R. China*

<sup>c</sup> *Institute of Theoretical Chemistry, Jilin University, Changchun 130023, P.R. China*

**Table S1** Frontier molecular orbital energies (eV) and compositions (%) in the ground state for complex **1**

| MO  | Energy | Contribution (%) |                |        |           | Assignment                         |
|-----|--------|------------------|----------------|--------|-----------|------------------------------------|
|     |        | Ir               | C <sup>N</sup> | pyrapy | mbiphrapy |                                    |
| L+8 | -2.31  | 2                | 12             | 8      | 78        | $\pi^*$ ( mbiphrapy)               |
| L+7 | -2.68  | 1                | 4              | 78     | 17        | $\pi^*$ ( pyrapy)                  |
| L+6 | -2.88  | 0                | 5              | 8      | 87        | $\pi^*$ ( mbiphrapy)               |
| L+5 | -3.24  | 2                | 95             | 1      | 3         | $\pi^*$ ( C <sup>N</sup> )         |
| L+4 | -3.35  | 2                | 91             | 6      | 1         | $\pi^*$ ( C <sup>N</sup> )         |
| L+3 | -3.82  | 1                | 16             | 83     | 0         | $\pi^*$ ( C <sup>N</sup> + pyrapy) |
| L+2 | -3.87  | 4                | 87             | 9      | 1         | $\pi^*$ (C <sup>N</sup> )          |
| L+1 | -4.01  | 5                | 92             | 3      | 0         | $\pi^*$ ( C <sup>N</sup> )         |
| L   | -4.56  | 3                | 2              | 95     | 1         | $\pi^*$ ( pyrapy)                  |
| H   | -7.41  | 0                | 0              | 0      | 100       | $\pi$ (mbiphrapy)                  |
| H-1 | -8.14  | 0                | 0              | 0      | 100       | $\pi$ (mbiphrapy)                  |
| H-2 | -8.18  | 0                | 0              | 0      | 100       | $\pi$ (mbiphrapy)                  |
| H-3 | -8.34  | 0                | 2              | 0      | 97        | $\pi$ (mbiphrapy)                  |
| H-4 | -8.47  | 31               | 66             | 1      | 1         | d(Ir)+ $\pi$ (C <sup>N</sup> )     |
| H-5 | -8.81  | 4                | 91             | 1      | 5         | $\pi$ (C <sup>N</sup> )            |
| H-6 | -8.85  | 0                | 3              | 0      | 97        | $\pi$ (mbiphrapy)                  |
| H-7 | -8.91  | 8                | 89             | 1      | 3         | $\pi$ (C <sup>N</sup> )            |
| H-8 | -8.98  | 0                | 0              | 0      | 99        | $\pi$ (mbiphrapy)                  |

**Table S2** Frontier molecular orbital energies (eV) and compositions (%) in the ground state for complex **1a**

| MO  | Energy | Contribution (%) |                |        |              | Assignment                         |
|-----|--------|------------------|----------------|--------|--------------|------------------------------------|
|     |        | Ir               | C <sup>N</sup> | pyrapy | mbipbipyrapy |                                    |
| L+8 | -2.26  | 1                | 3              | 8      | 87           | $\pi^*$ ( mbipbipyrapy)            |
| L+7 | -2.60  | 1                | 2              | 81     | 15           | $\pi^*$ ( pyrapy)                  |
| L+6 | -2.85  | 0                | 6              | 4      | 89           | $\pi^*$ ( mbipbipyrapy)            |
| L+5 | -3.22  | 2                | 94             | 0      | 4            | $\pi^*$ ( C <sup>N</sup> )         |
| L+4 | -3.34  | 2                | 88             | 9      | 1            | $\pi^*$ ( C <sup>N</sup> )         |
| L+3 | -3.73  | 1                | 26             | 73     | 0            | $\pi^*$ ( C <sup>N</sup> + pyrapy) |
| L+2 | -3.77  | 4                | 80             | 16     | 1            | $\pi^*$ ( C <sup>N</sup> + pyrapy) |
| L+1 | -3.91  | 5                | 91             | 4      | 0            | $\pi^*$ ( C <sup>N</sup> )         |
| L   | -4.46  | 3                | 2              | 95     | 1            | $\pi^*$ ( pyrapy)                  |
| H   | -7.40  | 0                | 0              | 0      | 100          | $\pi$ (mbipbipyrapy)               |
| H-1 | -8.14  | 0                | 0              | 0      | 100          | $\pi$ (mbipbipyrapy)               |
| H-2 | -8.19  | 0                | 0              | 0      | 99           | $\pi$ (mbipbipyrapy)               |
| H-3 | -8.24  | 28               | 68             | 1      | 3            | d(Ir)+ $\pi$ (C <sup>N</sup> )     |
| H-4 | -8.33  | 1                | 2              | 0      | 96           | $\pi$ (mbipbipyrapy)               |
| H-5 | -8.61  | 3                | 95             | 0      | 1            | $\pi$ (C <sup>N</sup> )            |
| H-6 | -8.85  | 0                | 2              | 0      | 97           | $\pi$ (mbipbipyrapy)               |
| H-7 | -8.88  | 14               | 79             | 1      | 6            | d(Ir)+ $\pi$ (C <sup>N</sup> )     |
| H-8 | -8.99  | 0                | 0              | 0      | 99           | $\pi$ (mbipbipyrapy)               |

**Table S3** Frontier molecular orbital energies (eV) and compositions (%) in the ground state for complex **1b**

| MO  | Energy | Contribution (%) |                |                         |           | Assignment                                  |
|-----|--------|------------------|----------------|-------------------------|-----------|---------------------------------------------|
|     |        | Ir               | C <sup>N</sup> | CF <sub>3</sub> -pyrapy | mbiphrapy |                                             |
| L+8 | -2.35  | 1                | 5              | 5                       | 89        | $\pi^*$ ( mbiphrapy)                        |
| L+7 | -2.76  | 1                | 2              | 79                      | 17        | $\pi^*$ (CF <sub>3</sub> -pyrapy+mbiphrapy) |
| L+6 | -2.92  | 1                | 6              | 9                       | 84        | $\pi^*$ ( mbiphrapy)                        |
| L+5 | -3.31  | 2                | 94             | 0                       | 4         | $\pi^*$ ( C <sup>N</sup> )                  |
| L+4 | -3.45  | 2                | 93             | 4                       | 1         | $\pi^*$ ( C <sup>N</sup> )                  |
| L+3 | -3.85  | 4                | 94             | 1                       | 1         | $\pi^*$ ( C <sup>N</sup> )                  |
| L+2 | -3.99  | 4                | 86             | 10                      | 0         | $\pi^*$ (C <sup>N</sup> )                   |
| L+1 | -4.11  | 2                | 11             | 87                      | 0         | $\pi^*$ (CF <sub>3</sub> -pyrapy)           |
| L   | -4.81  | 3                | 1              | 95                      | 1         | $\pi^*$ (CF <sub>3</sub> -pyrapy)           |
| H   | -7.43  | 0                | 0              | 0                       | 100       | $\pi$ (mbiphrapy)                           |
| H-1 | -8.17  | 0                | 0              | 0                       | 100       | $\pi$ (mbiphrapy)                           |
| H-2 | -8.22  | 0                | 0              | 0                       | 100       | $\pi$ (mbiphrapy)                           |
| H-3 | -8.34  | 24               | 63             | 1                       | 13        | d(Ir)+ $\pi$ (C <sup>N</sup> )              |
| H-4 | -8.39  | 4                | 10             | 0                       | 86        | $\pi$ (mbiphrapy)                           |
| H-5 | -8.71  | 3                | 95             | 0                       | 1         | $\pi$ (C <sup>N</sup> )                     |
| H-6 | -8.88  | 0                | 0              | 0                       | 100       | $\pi$ (mbiphrapy)                           |
| H-7 | -8.98  | 13               | 82             | 1                       | 3         | d(Ir)+ $\pi$ (C <sup>N</sup> )              |
| H-8 | -9.03  | 0                | 0              | 0                       | 100       | $\pi$ (mbiphrapy)                           |

**Table S4** Frontier molecular orbital energies (eV) and compositions (%) in the ground state for complex **1c**

| MO  | Energy | Contribution (%) |                |                         |           | Assignment                            |
|-----|--------|------------------|----------------|-------------------------|-----------|---------------------------------------|
|     |        | Ir               | C <sup>N</sup> | CF <sub>3</sub> -pyrapy | mbiphrapy |                                       |
| L+8 | -2.40  | 4                | 20             | 6                       | 71        | $\pi^*(C^N+mbiphrapy)$                |
| L+7 | -2.82  | 1                | 2              | 70                      | 26        | $\pi^*(CF_3\text{-pyrapy}+mbiphrapy)$ |
| L+6 | -2.96  | 1                | 5              | 18                      | 76        | $\pi^*(CF_3\text{-pyrapy}+mbiphrapy)$ |
| L+5 | -3.33  | 2                | 95             | 1                       | 3         | $\pi^*(C^N)$                          |
| L+4 | -3.45  | 2                | 94             | 4                       | 1         | $\pi^*(C^N)$                          |
| L+3 | -3.96  | 4                | 94             | 1                       | 1         | $\pi^*(C^N)$                          |
| L+2 | -4.10  | 4                | 85             | 10                      | 0         | $\pi^*(C^N)$                          |
| L+1 | -4.19  | 2                | 11             | 87                      | 0         | $\pi^*(CF_3\text{-pyrapy})$           |
| L   | -4.90  | 3                | 1              | 95                      | 1         | $\pi^*(CF_3\text{-pyrapy})$           |
| H   | -7.44  | 0                | 0              | 0                       | 100       | $\pi(mbiphrapy)$                      |
| H-1 | -8.16  | 0                | 0              | 0                       | 100       | $\pi(mbiphrapy)$                      |
| H-2 | -8.21  | 0                | 0              | 0                       | 100       | $\pi(mbiphrapy)$                      |
| H-3 | -8.38  | 0                | 2              | 0                       | 98        | $\pi(mbiphrapy)$                      |
| H-4 | -8.57  | 30               | 68             | 1                       | 1         | $d(Ir)+\pi(C^N)$                      |
| H-5 | -8.87  | 0                | 3              | 0                       | 96        | $\pi(mbiphrapy)$                      |
| H-6 | -8.90  | 4                | 90             | 0                       | 6         | $\pi(C^N)$                            |
| H-7 | -9.01  | 8                | 88             | 1                       | 4         | $\pi(C^N)$                            |
| H-8 | -9.02  | 0                | 2              | 0                       | 98        | $\pi(mbiphrapy)$                      |

**Table S5** Frontier molecular orbital energies (eV) and compositions (%) in the ground state for complex **2**

| MO  | Energy | Contribution (%) |                |       |          | Assignment                     |
|-----|--------|------------------|----------------|-------|----------|--------------------------------|
|     |        | Ir               | C <sup>N</sup> | tripy | mphtripy |                                |
| L+8 | -2.96  | 0                | 1              | 2     | 97       | $\pi^*$ ( mphtripy)            |
| L+7 | -2.97  | 0                | 5              | 7     | 88       | $\pi^*$ ( mphtripy)            |
| L+6 | -3.08  | 2                | 91             | 3     | 4        | $\pi^*$ (C <sup>N</sup> )      |
| L+5 | -3.16  | 0                | 2              | 6     | 92       | $\pi^*$ ( mphtripy)            |
| L+4 | -3.35  | 1                | 11             | 78    | 11       | $\pi^*$ ( triapy)              |
| L+3 | -3.49  | 4                | 86             | 8     | 2        | $\pi^*$ ( C <sup>N</sup> )     |
| L+2 | -3.74  | 4                | 84             | 11    | 1        | $\pi^*$ (C <sup>N</sup> )      |
| L+1 | -3.75  | 2                | 13             | 81    | 3        | $\pi^*$ ( triapy)              |
| L   | -4.35  | 2                | 0              | 96    | 1        | $\pi^*$ ( triapy)              |
| H   | -8.09  | 29               | 69             | 1     | 0        | d(Ir)+ $\pi$ (C <sup>N</sup> ) |
| H-1 | -8.43  | 6                | 93             | 0     | 0        | $\pi$ (C <sup>N</sup> )        |
| H-2 | -8.62  | 5                | 94             | 0     | 0        | $\pi$ (C <sup>N</sup> )        |
| H-3 | -8.92  | 3                | 96             | 1     | 0        | $\pi$ (C <sup>N</sup> )        |
| H-4 | -9.00  | 1                | 0              | 0     | 99       | $\pi$ (mphtripy)               |
| H-5 | -9.07  | 68               | 26             | 5     | 1        | d(Ir)+ $\pi$ (C <sup>N</sup> ) |
| H-6 | -9.18  | 66               | 26             | 8     | 1        | d(Ir)+ $\pi$ (C <sup>N</sup> ) |
| H-7 | -9.71  | 0                | 0              | 0     | 100      | $\pi$ (mphtripy)               |
| H-8 | -9.84  | 0                | 0              | 5     | 95       | $\pi$ (mphtripy)               |

**Table S6** Frontier molecular orbital energies (eV) and compositions (%) in the ground state for complex **2a**

| MO  | Energy | Contribution (%) |                |        |           | Assignment                                 |
|-----|--------|------------------|----------------|--------|-----------|--------------------------------------------|
|     |        | Ir               | C <sup>N</sup> | triapy | mphtriapy |                                            |
| L+8 | -2.82  | 0                | 1              | 17     | 81        | $\pi^*(\text{triapy}+\text{mphtriapy})$    |
| L+7 | -2.94  | 2                | 94             | 1      | 4         | $\pi^*(\text{C}^{\text{N}})$               |
| L+6 | -2.98  | 0                | 5              | 2      | 93        | $\pi^*(\text{mphtriapy})$                  |
| L+5 | -3.03  | 2                | 79             | 8      | 11        | $\pi^*(\text{C}^{\text{N}})$               |
| L+4 | -3.13  | 1                | 5              | 60     | 35        | $\pi^*(\text{triapy}+\text{mphtriapy})$    |
| L+3 | -3.46  | 3                | 46             | 50     | 1         | $\pi^*(\text{C}^{\text{N}}+\text{triapy})$ |
| L+2 | -3.50  | 3                | 61             | 36     | 1         | $\pi^*(\text{C}^{\text{N}}+\text{triapy})$ |
| L+1 | -3.60  | 5                | 93             | 2      | 0         | $\pi^*(\text{C}^{\text{N}})$               |
| L   | -4.09  | 3                | 2              | 96     | 0         | $\pi^*(\text{triapy})$                     |
| H   | -7.86  | 29               | 70             | 1      | 0         | $d(\text{Ir})+\pi(\text{C}^{\text{N}})$    |
| H-1 | -8.29  | 4                | 95             | 0      | 0         | $\pi(\text{C}^{\text{N}})$                 |
| H-2 | -8.55  | 11               | 89             | 1      | 0         | $\pi(\text{C}^{\text{N}})$                 |
| H-3 | -8.70  | 0                | 0              | 0      | 100       | $\pi(\text{mphtriapy})$                    |
| H-4 | -8.89  | 23               | 73             | 4      | 0         | $d(\text{Ir})+\pi(\text{C}^{\text{N}})$    |
| H-5 | -8.92  | 68               | 25             | 6      | 0         | $d(\text{Ir})+\pi(\text{C}^{\text{N}})$    |
| H-6 | -9.02  | 47               | 47             | 6      | 0         | $d(\text{Ir})+\pi(\text{C}^{\text{N}})$    |
| H-7 | -9.32  | 0                | 0              | 0      | 100       | $\pi(\text{mphtriapy})$                    |
| H-8 | -9.73  | 1                | 2              | 86     | 11        | $\pi(\text{triapy})$                       |

**Table S7** Frontier molecular orbital energies (eV) and compositions (%) in the ground state for complex **2b**

| MO  | Energy | Contribution (%) |                |                         |           | Assignment                                            |
|-----|--------|------------------|----------------|-------------------------|-----------|-------------------------------------------------------|
|     |        | Ir               | C <sup>N</sup> | CF <sub>3</sub> -triapy | mphtriapy |                                                       |
| L+8 | -2.89  | 1                | 2              | 18                      | 79        | $\pi^*(\text{CF}_3\text{-triapy+mphtriapy})$          |
| L+7 | -2.99  | 0                | 0              | 2                       | 97        | $\pi^*(\text{mphtriapy})$                             |
| L+6 | -3.06  | 2                | 96             | 1                       | 2         | $\pi^*(\text{C}^{\wedge}\text{N})$                    |
| L+5 | -3.14  | 2                | 74             | 15                      | 9         | $\pi^*(\text{C}^{\wedge}\text{N})$                    |
| L+4 | -3.28  | 1                | 22             | 63                      | 13        | $\pi^*(\text{C}^{\wedge}\text{N+CF}_3\text{-triapy})$ |
| L+3 | -3.60  | 4                | 95             | 1                       | 0         | $\pi^*(\text{C}^{\wedge}\text{N})$                    |
| L+2 | -3.72  | 4                | 94             | 2                       | 0         | $\pi^*(\text{C}^{\wedge}\text{N})$                    |
| L+1 | -3.88  | 1                | 5              | 94                      | 1         | $\pi^*(\text{CF}_3\text{-triapy})$                    |
| L   | -4.52  | 3                | 0              | 96                      | 0         | $\pi^*(\text{CF}_3\text{-triapy})$                    |
| H   | -8.00  | 28               | 71             | 1                       | 0         | $d(\text{Ir})+\pi(\text{C}^{\wedge}\text{N})$         |
| H-1 | -8.41  | 4                | 96             | 0                       | 0         | $\pi(\text{C}^{\wedge}\text{N})$                      |
| H-2 | -8.51  | 0                | 0              | 0                       | 100       | $\pi(\text{mphtriapy})$                               |
| H-3 | -8.67  | 10               | 89             | 1                       | 0         | $\pi(\text{C}^{\wedge}\text{N})$                      |
| H-4 | -9.02  | 14               | 82             | 3                       | 0         | $\pi(\text{C}^{\wedge}\text{N})$                      |
| H-5 | -9.08  | 69               | 25             | 6                       | 0         | $d(\text{Ir})+\pi(\text{C}^{\wedge}\text{N})$         |
| H-6 | -9.13  | 0                | 0              | 0                       | 100       | $\pi(\text{mphtriapy})$                               |
| H-7 | -9.18  | 56               | 38             | 7                       | 0         | $d(\text{Ir})+\pi(\text{C}^{\wedge}\text{N})$         |
| H-8 | -9.73  | 0                | 0              | 0                       | 100       | $\pi(\text{mphtriapy})$                               |



**Table S8** Frontier molecular orbital energies (eV) and compositions (%) in the ground state for complex **2c**

| MO  | Energy | Contribution (%) |                |                         |           | Assignment                                    |
|-----|--------|------------------|----------------|-------------------------|-----------|-----------------------------------------------|
|     |        | Ir               | C <sup>N</sup> | CF <sub>3</sub> -triapy | mphtriapy |                                               |
| L+8 | -2.94  | 0                | 2              | 17                      | 80        | $\pi^*(\text{CF}_3\text{-triapy+mphtriapy})$  |
| L+7 | -3.03  | 0                | 0              | 2                       | 97        | $\pi^*(\text{mphtriapy})$                     |
| L+6 | -3.09  | 2                | 96             | 0                       | 2         | $\pi^*(\text{C}^{\wedge}\text{N})$            |
| L+5 | -3.16  | 2                | 86             | 7                       | 5         | $\pi^*(\text{C}^{\wedge}\text{N})$            |
| L+4 | -3.35  | 1                | 11             | 73                      | 15        | $\pi^*(\text{CF}_3\text{-triapy+mphtriapy})$  |
| L+3 | -3.71  | 4                | 94             | 2                       | 0         | $\pi^*(\text{C}^{\wedge}\text{N})$            |
| L+2 | -3.83  | 4                | 93             | 2                       | 0         | $\pi^*(\text{C}^{\wedge}\text{N})$            |
| L+1 | -3.98  | 1                | 5              | 94                      | 1         | $\pi^*(\text{CF}_3\text{-triapy})$            |
| L   | -4.62  | 3                | 0              | 96                      | 0         | $\pi^*(\text{CF}_3\text{-triapy})$            |
| H   | -8.22  | 30               | 68             | 1                       | 0         | $d(\text{Ir})+\pi(\text{C}^{\wedge}\text{N})$ |
| H-1 | -8.54  | 0                | 0              | 0                       | 100       | $\pi(\text{mphtriapy})$                       |
| H-2 | -8.59  | 5                | 95             | 0                       | 0         | $\pi(\text{C}^{\wedge}\text{N})$              |
| H-3 | -8.72  | 5                | 95             | 0                       | 0         | $\pi(\text{C}^{\wedge}\text{N})$              |
| H-4 | -9.04  | 3                | 95             | 1                       | 0         | $\pi(\text{C}^{\wedge}\text{N})$              |
| H-5 | -9.16  | 0                | 0              | 0                       | 100       | $\pi(\text{mphtriapy})$                       |
| H-6 | -9.22  | 69               | 24             | 6                       | 0         | $d(\text{Ir})+\pi(\text{C}^{\wedge}\text{N})$ |
| H-7 | -9.31  | 65               | 26             | 8                       | 0         | $d(\text{Ir})+\pi(\text{C}^{\wedge}\text{N})$ |
| H-8 | -9.77  | 0                | 0              | 0                       | 100       | $\pi(\text{mphtriapy})$                       |

**Table S9** Selected calculated wavelength (nm)/energies (eV), oscillator strength ( $f$ ), major contribution and transition characters for **1-1c** in CH<sub>2</sub>Cl<sub>2</sub> media, along with the experimental data for **1**

|           | State           | $\lambda/E$ | $f$   | Configuration | Assignment                                                                                                       | Exptl <sup>a</sup> |
|-----------|-----------------|-------------|-------|---------------|------------------------------------------------------------------------------------------------------------------|--------------------|
| <b>1</b>  | S <sub>1</sub>  | 366/3.38    | 0.002 | H→L(96%)      | $[\pi(\text{mbiphpyrapy})\rightarrow\pi^*(\text{pyrapy})]$ ILCT                                                  | 363                |
|           | S <sub>22</sub> | 277/4.47    | 0.195 | H→L+4(65%)    | $[\pi(\text{mbiphpyrapy})\rightarrow\pi^*(\text{C}^{\wedge}\text{N})]$ LLCT                                      |                    |
|           | S <sub>27</sub> | 269/4.59    | 0.743 | H-7→L (56%)   | $[\pi(\text{C}^{\wedge}\text{N})\rightarrow\pi^*(\text{pyrapy})]$ LLCT                                           |                    |
|           | S <sub>31</sub> | 263/4.70    | 0.339 | H-1→L+6 (79%) | $[\pi(\text{mbiphpyrapy})\rightarrow\pi^*(\text{mbiphpyrapy})]$ ILCT                                             |                    |
|           | S <sub>40</sub> | 252/4.91    | 0.176 | H-1→L+7(58%)  | $[\pi(\text{mbiphpyrapy})\rightarrow\pi^*(\text{pyrapy})]$ ILCT                                                  |                    |
|           | S <sub>44</sub> | 251/4.93    | 0.205 | H-5→L+3(50%)  | $[\pi(\text{C}^{\wedge}\text{N})\rightarrow\pi^*(\text{C}^{\wedge}\text{N}+\text{pyrapy})]$ LLCT/ILCT            |                    |
|           | S <sub>54</sub> | 244/5.07    | 0.132 | H→L+5(49%)    | $[\pi(\text{mbiphpyrapy})\rightarrow\pi^*(\text{C}^{\wedge}\text{N})]$ LLCT                                      |                    |
| <b>1a</b> | S <sub>1</sub>  | 381/3.25    | 0.002 | H→L(97%)      | $[\pi(\text{mbiphpyrapy})\rightarrow\pi^*(\text{pyrapy})]$ ILCT                                                  |                    |
|           | S <sub>21</sub> | 279/4.43    | 0.088 | H-6→L+2(51%)  | $[\pi(\text{mbiphpyrapy})\rightarrow\pi^*(\text{C}^{\wedge}\text{N}+\text{pyrapy})]$ LLCT /ILCT                  |                    |
|           | S <sub>26</sub> | 270/4.58    | 0.263 | H→L+6(51%)    | $[\pi(\text{mbiphpyrapy})\rightarrow\pi^*(\text{mbiphpyrapy})]$ ILCT                                             |                    |
|           | S <sub>31</sub> | 263/4.71    | 0.405 | H-1→L+6(43%)  | $[\pi(\text{mbiphpyrapy})\rightarrow\pi^*(\text{mbiphpyrapy})]$ ILCT                                             |                    |
|           | S <sub>36</sub> | 257/4.81    | 0.128 | H-8→L(49%)    | $[\pi(\text{mbiphpyrapy})\rightarrow\pi^*(\text{pyrapy})]$ ILCT                                                  |                    |
|           | S <sub>42</sub> | 251/4.92    | 0.173 | H-1→L+7 (47%) | $[\pi(\text{mbiphpyrapy})\rightarrow\pi^*(\text{pyrapy})]$ ILCT                                                  |                    |
|           | S <sub>50</sub> | 247/5.00    | 0.102 | H-1→L+4 (66%) | $[\pi(\text{mbiphpyrapy})\rightarrow\pi^*(\text{C}^{\wedge}\text{N})]$ LLCT                                      |                    |
| <b>1b</b> | S <sub>1</sub>  | 417/2.96    | 0.002 | H→L(97%)      | $[\pi(\text{mbiphpyrapy})\rightarrow\pi^*(\text{CF}_3\text{-pyrapy})]$ ILCT                                      |                    |
|           | S <sub>27</sub> | 275/4.49    | 0.152 | H-6→L (43%)   | $[\pi(\text{mbiphpyrapy})\rightarrow\pi^*(\text{CF}_3\text{-pyrapy})]$ ILCT                                      |                    |
|           | S <sub>34</sub> | 267/4.63    | 0.441 | H-1→L+4 (56%) | $[\pi(\text{mbiphpyrapy})\rightarrow\pi^*(\text{C}^{\wedge}\text{N})]$ LLCT                                      |                    |
|           | S <sub>38</sub> | 263/4.70    | 0.206 | H-6→L+3 (66%) | $[\pi(\text{mbiphpyrapy})\rightarrow\pi^*(\text{C}^{\wedge}\text{N})]$ LLCT                                      |                    |
|           | S <sub>43</sub> | 257/4.82    | 0.236 | H-3→L+5(74%)  | $[\text{d}(\text{Ir})+\pi(\text{C}^{\wedge}\text{N})\rightarrow\pi^*(\text{C}^{\wedge}\text{N})]$ MLCT/LLCT/ILCT |                    |
|           | S <sub>45</sub> | 252/4.91    | 0.268 | H-1→L+7 (54%) | $[\pi(\text{mbiphpyrapy})\rightarrow\pi^*(\text{CF}_3\text{-pyrapy}+\text{mbiphpyrapy})]$ ILCT                   |                    |
|           | S <sub>54</sub> | 247/5.01    | 0.128 | H→L+7 (46%)   | $[\pi(\text{mbiphpyrapy})\rightarrow\pi^*(\text{CF}_3\text{-pyrapy}+\text{mbiphpyrapy})]$ ILCT                   |                    |
| <b>1c</b> | S <sub>1</sub>  | 399/3.10    | 0.001 | H→L(73%)      | $[\pi(\text{mbiphpyrapy})\rightarrow\pi^*(\text{CF}_3\text{-pyrapy})]$ ILCT                                      |                    |
|           | S <sub>25</sub> | 277/4.46    | 0.178 | H-2→L+4 (61%) | $[\pi(\text{mbiphpyrapy})\rightarrow\pi^*(\text{C}^{\wedge}\text{N})]$ LLCT                                      |                    |
|           | S <sub>28</sub> | 275/4.50    | 0.170 | H-8→L+1 (49%) | $[\pi(\text{mbiphpyrapy})\rightarrow\pi^*(\text{CF}_3\text{-pyrapy})]$ ILCT                                      |                    |
|           | S <sub>35</sub> | 267/4.63    | 0.667 | H-5→L+5 (55%) | $[\pi(\text{mbiphpyrapy})\rightarrow\pi^*(\text{C}^{\wedge}\text{N})]$ LLCT                                      |                    |
|           | S <sub>39</sub> | 262/4.73    | 0.261 | H-2→L+4 (51%) | $[\pi(\text{mbiphpyrapy})\rightarrow\pi^*(\text{C}^{\wedge}\text{N})]$ LLCT                                      |                    |
|           | S <sub>45</sub> | 252/4.91    | 0.416 | H-2→L+5 (45%) | $[\pi(\text{mbiphpyrapy})\rightarrow\pi^*(\text{C}^{\wedge}\text{N})]$ LLCT                                      |                    |
|           | S <sub>57</sub> | 244/5.06    | 0.182 | H→L+8 (43%)   | $[\pi(\text{mbiphpyrapy})\rightarrow\pi^*(\text{C}^{\wedge}\text{N}+\text{mbiphpyrapy})]$ LLCT/ILCT              |                    |

<sup>a</sup> From ref. 19

**Table S10** Selected calculated wavelength (nm)/energies (eV), oscillator strength ( $f$ ), major contribution and transition characters for **2-2c** in CH<sub>2</sub>Cl<sub>2</sub> media, along with the experimental data for **2**

|           | State           | $\lambda/E$ | $f$   | Configuration | Assignment                                                                            | Exptl <sup>a</sup> |
|-----------|-----------------|-------------|-------|---------------|---------------------------------------------------------------------------------------|--------------------|
| <b>2</b>  | S <sub>1</sub>  | 371/3.33    | 0.002 | H→L(96%)      | [d(Ir)+ $\pi$ (C <sup>^</sup> N)→ $\pi^*$ (triapy)]MLCT/LLCT                          | 361                |
|           | S <sub>12</sub> | 293/4.22    | 0.170 | H-1→L+2 (73%) | [ $\pi$ (C <sup>^</sup> N)→ $\pi^*$ ( C <sup>^</sup> N)] LLCT/ILCT                    |                    |
|           | S <sub>18</sub> | 278/4.45    | 0.100 | H-5→L+1(53%)  | [d(Ir)+ $\pi$ (C <sup>^</sup> N)→ $\pi^*$ ( triapy)] MLCT/LLCT                        |                    |
|           | S <sub>28</sub> | 260/4.75    | 0.084 | H-2→L+3 (45%) | [ $\pi$ (C <sup>^</sup> N)→ $\pi^*$ ( C <sup>^</sup> N)] LLCT/ILCT                    |                    |
|           | S <sub>34</sub> | 251/4.92    | 0.100 | H-1→L+6(72%)  | [ $\pi$ (C <sup>^</sup> N)→ $\pi^*$ ( C <sup>^</sup> N)] LLCT/ILCT                    |                    |
|           | S <sub>39</sub> | 248/4.98    | 0.154 | H-2→L+6(60%)  | [ $\pi$ (C <sup>^</sup> N)→ $\pi^*$ ( C <sup>^</sup> N)] LLCT/ILCT                    |                    |
|           | S <sub>44</sub> | 244/5.07    | 0.123 | H-1→L+7 (48%) | [ $\pi$ (C <sup>^</sup> N)→ $\pi^*$ ( mphtriapy)] LLCT                                |                    |
| <b>2a</b> | S <sub>1</sub>  | 378/3.27    | 0.001 | H→L(97%)      | [d(Ir)+ $\pi$ (C <sup>^</sup> N)→ $\pi^*$ ( triapy)] MLCT/LLCT                        |                    |
|           | S <sub>10</sub> | 295/4.18    | 0.083 | H-2→L+1(57%)  | [ $\pi$ (C <sup>^</sup> N)→ $\pi^*$ ( C <sup>^</sup> N)] LLCT/ILCT                    |                    |
|           | S <sub>19</sub> | 278/4.44    | 0.158 | H-5→L+2 (47%) | [d(Ir)+ $\pi$ (C <sup>^</sup> N)→ $\pi^*$ ( C <sup>^</sup> N+ triapy)] MLCT/LLCT/ILCT |                    |
|           | S <sub>27</sub> | 259/4.76    | 0.114 | H-7→L(67%)    | [ $\pi$ (mphtriapy)→ $\pi^*$ ( triapy)] ILCT                                          |                    |
|           | S <sub>39</sub> | 249/4.96    | 0.425 | H-3→L+4(45%)  | [ $\pi$ (mphtriapy)→ $\pi^*$ ( triapy+mphtriapy)] ILCT                                |                    |
|           | S <sub>42</sub> | 246/5.03    | 0.146 | H→L+8 (41%)   | [d(Ir)+ $\pi$ (C <sup>^</sup> N)→ $\pi^*$ (triapy+mphtriapy)] MLCT/LLCT               |                    |
|           | S <sub>55</sub> | 235/5.25    | 0.137 | H-5→L+7(60%)  | [d(Ir)+ $\pi$ (C <sup>^</sup> N)→ $\pi^*$ ( C <sup>^</sup> N)] MLCT/LLCT /ILCT        |                    |
| <b>2b</b> | S <sub>1</sub>  | 420/2.94    | 0.001 | H→L(97%)      | [d(Ir)+ $\pi$ (C <sup>^</sup> N)→ $\pi^*$ ( CF <sub>3</sub> -triapy)] MLCT/LLCT       |                    |
|           | S <sub>8</sub>  | 316/3.91    | 0.113 | H-5→L (70%)   | [d(Ir)+ $\pi$ (C <sup>^</sup> N)→ $\pi^*$ ( CF <sub>3</sub> -triapy)] MLCT/LLCT       |                    |
|           | S <sub>23</sub> | 276/4.48    | 0.143 | H-4→L+2(45%)  | [ $\pi$ (C <sup>^</sup> N)→ $\pi^*$ ( C <sup>^</sup> N)] MLCT/LLCT/ILCT               |                    |
|           | S <sub>28</sub> | 263/4.71    | 0.108 | H-6→L+1(49%)  | [ $\pi$ (mphtriapy)→ $\pi^*$ ( CF <sub>3</sub> -triapy)] ILCT                         |                    |
|           | S <sub>35</sub> | 256/4.84    | 0.256 | H-1→L+6 (45%) | [ $\pi$ (C <sup>^</sup> N)→ $\pi^*$ ( C <sup>^</sup> N)] LLCT/ILCT                    |                    |
|           | S <sub>41</sub> | 251/4.93    | 0.374 | H-2→L+5(70%)  | [ $\pi$ (mphtriapy)→ $\pi^*$ ( C <sup>^</sup> N)] LLCT/ILCT                           |                    |
|           | S <sub>46</sub> | 246/5.02    | 0.107 | H→L+2 (43%)   | [d(Ir)+ $\pi$ (C <sup>^</sup> N)→ $\pi^*$ (C <sup>^</sup> N)] MLCT/LLCT/ILCT          |                    |
| <b>2c</b> | S <sub>1</sub>  | 402/3.07    | 0.003 | H→L(97%)      | [d(Ir)+ $\pi$ (C <sup>^</sup> N)→ $\pi^*$ ( CF <sub>3</sub> -triapy)] MLCT/LLCT       |                    |
|           | S <sub>9</sub>  | 311/3.98    | 0.139 | H-6→L (63%)   | [d(Ir)+ $\pi$ (C <sup>^</sup> N)→ $\pi^*$ ( CF <sub>3</sub> -triapy)] MLCT/LLCT       |                    |
|           | S <sub>23</sub> | 273/4.52    | 0.135 | H-4→L+2 (73%) | [ $\pi$ (C <sup>^</sup> N)→ $\pi^*$ (C <sup>^</sup> N)] LLCT/ILCT                     |                    |
|           | S <sub>39</sub> | 251/4.93    | 0.298 | H-2→L+5 (55%) | [ $\pi$ (C <sup>^</sup> N)→ $\pi^*$ ( C <sup>^</sup> N)] LLCT/ILCT                    |                    |

<sup>a</sup> From ref. 19

**Table S11** Calculated phosphorescent emission wavelength ( $\lambda$ , in nm) for **1** and **2** in CH<sub>2</sub>Cl<sub>2</sub> media with the TDDFT method at M062X, M052X, PBE0, B3LYP, CAM-B3LYP and BP86 level, respectively, together with the experimental values

|   | Exptl <sup>a</sup> | M062X | M052X | PBE0 | B3LYP | CAM-B3LYP | BP86 |
|---|--------------------|-------|-------|------|-------|-----------|------|
| 1 | 454                | 479   | 511   | 555  | 540   | 567       | 553  |
| 2 | 454                | 476   | 507   | 552  | 538   | 561       | 556  |

<sup>a</sup> From ref. 19

**Table S12** Frontier molecular orbital energies (eV) and composition (%) of **1-1c** and **2-2c** in the lowest lying triplet excited state (L and H represent)

|           | MO | <i>E</i> | MO composition (%) |                  |                  | Assignment               |
|-----------|----|----------|--------------------|------------------|------------------|--------------------------|
|           |    |          | Ir                 | C <sup>^</sup> N | N <sup>^</sup> N |                          |
| <b>1</b>  |    |          | Ir                 | C <sup>^</sup> N | N <sup>^</sup> N |                          |
|           | L  | -4.55    | 3                  | 3                | 94               | $\pi^*(N^{\wedge}N)$     |
|           | H  | -7.40    | 0                  | 0                | 100              | $\pi(N^{\wedge}N)$       |
| <b>1a</b> |    |          | Ir                 | C <sup>^</sup> N | N <sup>^</sup> N |                          |
|           | L  | -4.88    | 4                  | 1                | 95               | $\pi^*(N^{\wedge}N)$     |
|           | H  | -7.39    | 0                  | 0                | 100              | $\pi(N^{\wedge}N)$       |
| <b>1b</b> |    |          | Ir                 | C <sup>^</sup> N | N <sup>^</sup> N |                          |
|           | L  | -5.26    | 4                  | 2                | 94               | $\pi^*(N^{\wedge}N)$     |
|           | H  | -7.40    | 0                  | 0                | 100              | $\pi(N^{\wedge}N)$       |
| <b>1c</b> |    |          | Ir                 | C <sup>^</sup> N | N <sup>^</sup> N |                          |
|           | L  | -5.32    | 4                  | 1                | 95               | $\pi^*(N^{\wedge}N)$     |
|           | H  | -7.35    | 0                  | 0                | 100              | $\pi(N^{\wedge}N)$       |
| <b>2</b>  |    |          | Ir                 | C <sup>^</sup> N | N <sup>^</sup> N |                          |
|           | L  | -4.35    | 2                  | 1                | 97               | $\pi^*(N^{\wedge}N)$     |
|           | H  | -8.02    | 26                 | 72               | 2                | $d(Ir)+\pi(C^{\wedge}N)$ |
| <b>2a</b> |    |          | Ir                 | C <sup>^</sup> N | N <sup>^</sup> N |                          |
|           | L  | -4.08    | 2                  | 2                | 96               | $\pi^*(N^{\wedge}N)$     |
|           | H  | -7.78    | 25                 | 74               | 1                | $d(Ir)+\pi(C^{\wedge}N)$ |
| <b>2b</b> |    |          | Ir                 | C <sup>^</sup> N | N <sup>^</sup> N |                          |
|           | L  | -5.03    | 4                  | 1                | 95               | $\pi^*(N^{\wedge}N)$     |
|           | H  | -7.88    | 28                 | 70               | 2                | $d(Ir)+\pi(C^{\wedge}N)$ |
| <b>2c</b> |    |          | Ir                 | C <sup>^</sup> N | N <sup>^</sup> N |                          |
|           | L  | -5.10    | 4                  | 1                | 95               | $\pi^*(N^{\wedge}N)$     |
|           | H  | -8.08    | 30                 | 67               | 3                | $d(Ir)+\pi(C^{\wedge}N)$ |

**Table S13** The xyz coordinates for the optimized structures for **1** in the S<sub>0</sub> and T<sub>1</sub> states at PBE0/6-31G\* level

|    | S <sub>0</sub> |             |             | T <sub>1</sub> |             |             |
|----|----------------|-------------|-------------|----------------|-------------|-------------|
| Ir | -3.36056800    | 0.18187000  | -0.09182900 | -3.35420400    | 0.18088900  | -0.08269400 |
| F  | -7.67405900    | -2.56696300 | 1.11376100  | -7.69030000    | -2.60592700 | 1.10335700  |
| F  | -4.60874200    | -2.15429800 | 4.59633600  | -4.59669600    | -2.21537000 | 4.57884100  |
| F  | 0.73634500     | -3.01545300 | 0.73623300  | 0.73079700     | -3.04659400 | 0.67730800  |
| F  | -2.32012100    | -4.57898100 | -2.41146700 | -2.35611800    | -4.54731800 | -2.47115600 |
| N  | -1.74517200    | 0.42998100  | 1.15259100  | -1.72199300    | 0.41081300  | 1.15705400  |
| C  | -0.83080100    | -0.58169200 | 1.15273900  | -0.81562400    | -0.60712900 | 1.13814700  |
| C  | 0.29692200     | -0.49304600 | 1.97834500  | 0.32016900     | -0.53574700 | 1.95405000  |
| H  | 1.02197700     | -1.29354500 | 1.97305600  | 1.03939400     | -1.34128500 | 1.93502300  |
| C  | 0.47686200     | 0.61490700  | 2.78928900  | 0.51638200     | 0.56400600  | 2.77261400  |
| H  | 1.35131500     | 0.67782800  | 3.43025600  | 1.39747800     | 0.61430400  | 3.40556600  |
| C  | -0.46862800    | 1.63798100  | 2.77305200  | -0.42016700    | 1.59542900  | 2.77375000  |
| H  | -0.36924800    | 2.52108700  | 3.39455000  | -0.30695400    | 2.47245900  | 3.40145600  |
| C  | -1.56192400    | 1.50278700  | 1.93739900  | -1.52282800    | 1.47599100  | 1.94764300  |
| H  | -2.33375400    | 2.26167100  | 1.88494100  | -2.28984500    | 2.24078000  | 1.90817500  |
| C  | -2.36038000    | -1.50759200 | -0.49901500 | -2.36393500    | -1.50465700 | -0.51575500 |
| C  | -1.16384100    | -1.67181600 | 0.24768600  | -1.16351600    | -1.68375200 | 0.22138700  |
| C  | -0.40427000    | -2.83210300 | 0.05520900  | -0.41306800    | -2.84623800 | 0.00685900  |
| C  | -0.76846600    | -3.82477900 | -0.83500700 | -0.79021200    | -3.82347200 | -0.89495000 |
| H  | -0.16389000    | -4.71516600 | -0.95888900 | -0.19129600    | -4.71513800 | -1.03636700 |
| C  | -1.94451100    | -3.63550200 | -1.54800800 | -1.97010200    | -3.61798500 | -1.59778200 |
| C  | -2.73890100    | -2.50596600 | -1.39882600 | -2.75670600    | -2.48623900 | -1.42745700 |
| H  | -3.65029600    | -2.43871000 | -1.98344400 | -3.67230900    | -2.40137700 | -2.00287300 |
| N  | -4.97363200    | -0.29357200 | -1.27726200 | -4.94751700    | -0.24953500 | -1.26687400 |
| C  | -5.94373100    | -1.04558600 | -0.68324300 | -5.95831500    | -1.04661400 | -0.64790600 |
| C  | -7.06786100    | -1.43261700 | -1.42443400 | -7.10400200    | -1.43087500 | -1.42760300 |
| H  | -7.83241100    | -2.03202800 | -0.95155200 | -7.85683300    | -2.05062700 | -0.96058400 |
| C  | -7.18752000    | -1.05496300 | -2.75165600 | -7.23714300    | -1.03147900 | -2.72370900 |
| H  | -8.05752700    | -1.36054500 | -3.32516400 | -8.10152000    | -1.32743200 | -3.30825500 |
| C  | -6.18380100    | -0.28825200 | -3.33969400 | -6.21714400    | -0.22284100 | -3.30189600 |
| H  | -6.23547400    | 0.02502300  | -4.37650600 | -6.27792600    | 0.11954500  | -4.32855800 |
| C  | -5.09639900    | 0.06882000  | -2.56372400 | -5.11160800    | 0.12452200  | -2.53160400 |
| H  | -4.28071200    | 0.65826200  | -2.96567700 | -4.31268900    | 0.72511600  | -2.95415000 |
| C  | -4.42275300    | -0.89080800 | 1.21373100  | -4.40150100    | -0.87209800 | 1.22481100  |
| C  | -5.66008000    | -1.37140700 | 0.70689700  | -5.68048600    | -1.36872100 | 0.67538400  |
| C  | -6.49620900    | -2.10533800 | 1.55805300  | -6.51812400    | -2.14585100 | 1.56033700  |
| C  | -6.16750400    | -2.38172500 | 2.87124400  | -6.16589100    | -2.42549800 | 2.84276200  |
| H  | -6.83314900    | -2.95377000 | 3.50621200  | -6.81570800    | -3.01100900 | 3.48325200  |
| C  | -4.95060000    | -1.90102800 | 3.33396600  | -4.92763400    | -1.93809200 | 3.32090800  |
| C  | -4.08061000    | -1.16665800 | 2.53726800  | -4.06204700    | -1.18222600 | 2.52947500  |
| H  | -3.14361500    | -0.83424000 | 2.97053100  | -3.12276300    | -0.85909000 | 2.96569100  |
| N  | -4.36481400    | 2.08677700  | 0.33538800  | -4.36268600    | 2.10028700  | 0.36308000  |
| C  | -4.07114800    | 3.12187800  | -0.48461300 | -4.07387500    | 3.13384300  | -0.45872900 |
| C  | -4.70505700    | 4.35651400  | -0.35849800 | -4.70890800    | 4.36791500  | -0.32981900 |
| H  | -4.44879800    | 5.16802000  | -1.03129000 | -4.45587700    | 5.18093500  | -1.00199300 |
| C  | -5.66057000    | 4.52751100  | 0.63425400  | -5.66270900    | 4.53583100  | 0.66515300  |
| H  | -6.16640700    | 5.48129800  | 0.74919000  | -6.17054500    | 5.48842600  | 0.78136200  |
| C  | -5.95652500    | 3.45963200  | 1.47630800  | -5.95471300    | 3.46742900  | 1.50816800  |
| H  | -6.69463100    | 3.54862800  | 2.26607400  | -6.69279000    | 3.55458300  | 2.29817900  |
| C  | -5.28773900    | 2.25740900  | 1.29112800  | -5.28102700    | 2.26808800  | 1.32185800  |
| H  | -5.48087200    | 1.39305500  | 1.91843000  | -5.46357000    | 1.40340100  | 1.95279100  |
| N  | -2.49256900    | 1.62835300  | -1.49860300 | -2.49071100    | 1.64613500  | -1.48123600 |
| N  | -1.60568100    | 1.62466300  | -2.49918200 | -1.60859600    | 1.64879500  | -2.48609100 |

|   |             |             |             |             |             |             |
|---|-------------|-------------|-------------|-------------|-------------|-------------|
| C | -1.57597300 | 2.82495400  | -3.12117500 | -1.58870200 | 2.84974200  | -3.10648500 |
| H | -0.90145600 | 3.00226900  | -3.94693600 | -0.91909500 | 3.03201300  | -3.93515200 |
| C | -2.49334200 | 3.64645700  | -2.50249300 | -2.50819300 | 3.66494900  | -2.48263700 |
| H | -2.72697700 | 4.66861200  | -2.76018300 | -2.74940600 | 4.68581400  | -2.73838000 |
| C | -3.04645000 | 2.85121500  | -1.48497500 | -3.05236700 | 2.86546000  | -1.46371600 |
| C | -0.70354400 | 0.50850800  | -2.72558400 | -0.70565500 | 0.53572200  | -2.72281700 |
| H | -0.48323000 | 0.50467800  | -3.79934400 | -0.48672000 | 0.54151700  | -3.79680200 |
| H | -1.25868300 | -0.40618100 | -2.49872300 | -1.25998500 | -0.38145400 | -2.50423500 |
| C | 0.57046900  | 0.57571500  | -1.91264500 | 0.56925700  | 0.59681000  | -1.91100700 |
| C | 1.36381100  | -0.57128000 | -1.83037500 | 1.36438800  | -0.54969300 | -1.83950000 |
| H | 1.03958200  | -1.48997800 | -2.31453600 | 1.04146300  | -1.46437700 | -2.33210100 |
| C | 2.55291700  | -0.55995100 | -1.11511700 | 2.55439700  | -0.54272300 | -1.12561200 |
| H | 3.13609000  | -1.47316800 | -1.03737100 | 3.13898700  | -1.45574700 | -1.05658000 |
| C | 2.99513300  | 0.60078600  | -0.46301000 | 2.99577900  | 0.61304000  | -0.46413600 |
| C | 2.19497000  | 1.74508800  | -0.55634700 | 2.19425700  | 1.75722900  | -0.54762000 |
| H | 2.52577700  | 2.66786500  | -0.08800900 | 2.52471600  | 2.67674500  | -0.07268100 |
| C | 0.99955600  | 1.73429700  | -1.26803900 | 0.99797700  | 1.75075300  | -1.25784300 |
| H | 0.40920700  | 2.64579100  | -1.31987300 | 0.40658700  | 2.66197000  | -1.30231800 |
| C | 4.26201100  | 0.61335000  | 0.29818400  | 4.26274300  | 0.62048600  | 0.29704100  |
| C | 4.38485800  | 1.34860200  | 1.48256800  | 4.38573300  | 1.34835400  | 1.48601500  |
| H | 3.53043000  | 1.90333400  | 1.86285400  | 3.53183300  | 1.90200200  | 1.86903300  |
| C | 5.58286900  | 1.36717600  | 2.18911400  | 5.58334400  | 1.36157800  | 2.19334500  |
| H | 5.65521700  | 1.94658700  | 3.10730600  | 5.65570500  | 1.93544200  | 3.11501700  |
| C | 6.68882200  | 0.64872100  | 1.73638700  | 6.68895000  | 0.64497400  | 1.73684800  |
| C | 6.57268800  | -0.08989200 | 0.55574200  | 6.57287100  | -0.08594600 | 0.55141000  |
| H | 7.43589300  | -0.63810000 | 0.18738400  | 7.43587000  | -0.63245500 | 0.18005900  |
| C | 5.37877900  | -0.10557000 | -0.15135400 | 5.37932900  | -0.09626600 | -0.15644600 |
| H | 5.32043400  | -0.65980900 | -1.08446400 | 5.32130800  | -0.64443500 | -1.09314800 |
| C | 7.98543400  | 0.65277700  | 2.51530900  | 7.98488900  | 0.64286500  | 2.51695200  |
| H | 7.95748100  | 1.41944000  | 3.29617200  | 7.95762500  | 1.40595000  | 3.30133700  |
| H | 8.14544600  | -0.31373000 | 3.00384400  | 8.14236700  | -0.32622000 | 3.00121500  |
| N | 9.77293200  | -0.15115700 | 1.12091000  | 9.77173700  | -0.15818500 | 1.12018600  |
| N | 9.14915500  | 0.88608300  | 1.69065200  | 9.14992400  | 0.87763700  | 1.69470800  |
| C | 9.65903400  | 2.08040000  | 1.29402400  | 9.66339000  | 2.07275200  | 1.30510100  |
| H | 9.25845200  | 3.01380600  | 1.66446100  | 9.26485800  | 3.00520600  | 1.68013100  |
| C | 10.68726200 | 1.80461100  | 0.42526700  | 10.69187900 | 1.79893300  | 0.43605600  |
| H | 11.34507200 | 2.49300100  | -0.08213000 | 11.35205800 | 2.48830800  | -0.06690600 |
| C | 10.71703500 | 0.39449100  | 0.35096000  | 10.71810400 | 0.38914800  | 0.35423300  |
| N | 12.50270100 | 0.23489600  | -1.21455900 | 12.50502800 | 0.23345900  | -1.21020900 |
| C | 11.63956300 | -0.43092800 | -0.43582800 | 11.63949600 | -0.43438200 | -0.43588200 |
| C | 11.60519800 | -1.82834600 | -0.36450000 | 11.60174900 | -1.83205100 | -0.37185200 |
| H | 10.88801400 | -2.31289200 | 0.28982300  | 10.88276000 | -2.31831400 | 0.27921000  |
| C | 12.50140700 | -2.55501000 | -1.13516100 | 12.49704400 | -2.55681400 | -1.14536900 |
| H | 12.50153800 | -3.64131100 | -1.10024600 | 12.49458000 | -3.64327800 | -1.11613200 |
| C | 13.40069800 | -1.87039300 | -1.94831600 | 13.39879800 | -1.87009400 | -1.95400400 |
| H | 14.12094500 | -2.39726200 | -2.56657000 | 14.11844200 | -2.39543000 | -2.57425700 |
| C | 13.35565700 | -0.47881300 | -1.94594500 | 13.35707400 | -0.47843300 | -1.94441100 |
| H | 14.04384700 | 0.09413000  | -2.56590600 | 14.04727700 | 0.09610200  | -2.56064000 |

**Table S14** The xyz coordinates for the optimized structures for **2** in the S<sub>0</sub> and T<sub>1</sub> states at PBE0/6-31G\* level

|    | S <sub>0</sub> |             |             | T <sub>1</sub> |             |             |
|----|----------------|-------------|-------------|----------------|-------------|-------------|
| Ir | -1.52191800    | -0.04680800 | -0.19851600 | -1.51670800    | -0.05692500 | -0.18551000 |
| N  | -0.18984700    | 1.64486200  | -0.69577500 | -0.17327500    | 1.65550600  | -0.68730800 |
| C  | 0.97155900     | 1.33597000  | -1.31712900 | 0.97221500     | 1.34701600  | -1.33473100 |
| C  | 1.88674100     | 2.31345000  | -1.69779500 | 1.87763000     | 2.32574100  | -1.73630500 |
| H  | 2.82355800     | 2.03544000  | -2.16960000 | 2.80374400     | 2.04935500  | -2.22963000 |
| C  | 1.58853300     | 3.64600300  | -1.44402400 | 1.58190600     | 3.65785000  | -1.47744800 |
| H  | 2.29409700     | 4.42345500  | -1.71889100 | 2.27844500     | 4.43683700  | -1.77043100 |
| C  | 0.38491000     | 3.96151100  | -0.82174400 | 0.39351200     | 3.97228300  | -0.82583600 |
| H  | 0.11115700     | 4.98898800  | -0.60744900 | 0.12313200     | 4.99971600  | -0.60712700 |
| C  | -0.47392200    | 2.93157500  | -0.46146800 | -0.45289700    | 2.94002100  | -0.44338100 |
| H  | -1.41882800    | 3.12104400  | 0.03751300  | -1.38246000    | 3.12582800  | 0.08561700  |
| N  | 1.78474100     | -2.13025700 | -1.85042500 | 1.79483300     | -2.11733100 | -1.87003500 |
| N  | 0.55227000     | -2.18246500 | -1.35280800 | 0.57292100     | -2.17612900 | -1.34909100 |
| N  | 0.18416900     | -0.95375900 | -1.16093000 | 0.19904800     | -0.94917000 | -1.15752400 |
| C  | 1.17609300     | -0.09000800 | -1.52418600 | 1.17677700     | -0.07946300 | -1.54344000 |
| C  | 2.22140500     | -0.85940600 | -1.98261900 | 2.21905700     | -0.84392400 | -2.01716300 |
| H  | 3.21136500     | -0.62015400 | -2.33886400 | 3.19992200     | -0.59954600 | -2.39445500 |
| C  | 2.50371300     | -3.37005000 | -2.13236200 | 2.51950300     | -3.35249400 | -2.15711800 |
| H  | 2.48880600     | -3.54770400 | -3.21260200 | 2.50609300     | -3.52478200 | -3.23819600 |
| H  | 1.91174300     | -4.15717900 | -1.65524000 | 1.93049900     | -4.14435700 | -1.68423900 |
| N  | 5.34019800     | 3.15066800  | -0.42150300 | 5.32827200     | 3.18337600  | -0.36595000 |
| C  | 4.65561700     | 2.83305500  | 0.68697800  | 4.62123200     | 2.84328700  | 0.72144900  |
| C  | 3.94583000     | 3.77253900  | 1.44168300  | 3.88088100     | 3.76400900  | 1.46971700  |
| H  | 3.41735400     | 3.45515900  | 2.33463400  | 3.33626800     | 3.42938400  | 2.34655300  |
| C  | 3.96261100     | 5.09939000  | 1.03153700  | 3.88834800     | 5.09556800  | 1.07478700  |
| H  | 3.43619500     | 5.85816000  | 1.60425400  | 3.33780700     | 5.84029900  | 1.64325300  |
| C  | 4.68050100     | 5.44262900  | -0.11169100 | 4.62808600     | 5.46190000  | -0.04699600 |
| H  | 4.73569300     | 6.46978700  | -0.45897200 | 4.67659800     | 6.49360500  | -0.38156900 |
| C  | 5.34810600     | 4.42916900  | -0.79713900 | 5.32700900     | 4.46596700  | -0.72696200 |
| H  | 5.92354200     | 4.65747600  | -1.69293100 | 5.92094300     | 4.71271900  | -1.60562900 |
| N  | 5.24718700     | -0.62997400 | 1.41436900  | 5.23911400     | -0.62216200 | 1.41464900  |
| N  | 4.16505400     | -0.37583500 | 2.16498300  | 4.14174500     | -0.38992700 | 2.14985100  |
| N  | 3.84151000     | 0.86598900  | 1.97942900  | 3.80758000     | 0.85085200  | 1.97504100  |
| C  | 4.70970100     | 1.42820900  | 1.09431700  | 4.68435200     | 1.43420800  | 1.11248900  |
| C  | 5.61843200     | 0.46159600  | 0.71607000  | 5.61005300     | 0.48259600  | 0.73736200  |
| H  | 6.46507300     | 0.48780500  | 0.04798000  | 6.46706300     | 0.52682300  | 0.08361100  |
| C  | 5.81027900     | -1.96999100 | 1.38694200  | 5.81411800     | -1.95669400 | 1.37544800  |
| H  | 5.35611400     | -2.49215800 | 2.23430200  | 5.36603800     | -2.49040100 | 2.21886800  |
| H  | 6.88692900     | -1.90348900 | 1.56909400  | 6.89023700     | -1.88144300 | 1.55696400  |
| C  | 3.92092800     | -3.32644000 | -1.61512800 | 3.93593300     | -3.30478600 | -1.63781100 |
| C  | 4.21075600     | -2.73928100 | -0.38449200 | 4.22105500     | -2.72020700 | -0.40489900 |
| H  | 3.41621300     | -2.30343400 | 0.21868600  | 3.42374200     | -2.28866700 | 0.19768300  |
| C  | 5.52352100     | -2.67342100 | 0.08161900  | 5.53239400     | -2.65277900 | 0.06492500  |
| C  | 6.54797800     | -3.24063000 | -0.67502700 | 6.56033300     | -3.21423300 | -0.69130400 |
| H  | 7.57448900     | -3.19524200 | -0.31942500 | 7.58583500     | -3.16735700 | -0.33299000 |
| C  | 6.26119900     | -3.85657500 | -1.89077200 | 6.27832800     | -3.82657000 | -1.90997300 |
| H  | 7.06203100     | -4.29433400 | -2.47899500 | 7.08193900     | -4.25963600 | -2.49787700 |
| C  | 4.95527800     | -3.88475000 | -2.36895500 | 4.97355900     | -3.85754600 | -2.39115600 |
| H  | 4.74112600     | -4.34111900 | -3.33247400 | 4.76295900     | -4.31172800 | -3.35648900 |
| N  | -0.64493500    | -0.56215800 | 1.59021900  | -0.64174700    | -0.59477500 | 1.60737400  |
| C  | -1.16474900    | -1.66218600 | 2.20775500  | -1.17127300    | -1.69754800 | 2.21021100  |
| C  | -0.63713300    | -2.07362300 | 3.43843700  | -0.65112200    | -2.12791800 | 3.43720700  |
| H  | -1.05962300    | -2.93749200 | 3.93098500  | -1.08201200    | -2.99340400 | 3.91953600  |

|   |             |             |             |             |             |             |
|---|-------------|-------------|-------------|-------------|-------------|-------------|
| C | 0.41865700  | -1.38084600 | 4.00814800  | 0.41063600  | -1.45119300 | 4.01577800  |
| H | 0.82770600  | -1.70586700 | 4.96029900  | 0.81452700  | -1.79020200 | 4.96526600  |
| C | 0.95362600  | -0.27799900 | 3.34735900  | 0.95871900  | -0.34768400 | 3.36716700  |
| H | 1.80241800  | 0.27724500  | 3.72821000  | 1.81259000  | 0.19454700  | 3.75526100  |
| C | 0.38537300  | 0.09663800  | 2.14381100  | 0.39548600  | 0.04668500  | 2.16713300  |
| H | 0.76184600  | 0.94853200  | 1.59068200  | 0.78207200  | 0.90014100  | 1.62306700  |
| C | -2.58690100 | -1.68468500 | 0.23315900  | -2.58109800 | -1.69629600 | 0.22290800  |
| C | -2.24185300 | -2.29859600 | 1.46515700  | -2.24678300 | -2.32092600 | 1.45277700  |
| C | -2.92913400 | -3.45461300 | 1.85495500  | -2.94301000 | -3.47713600 | 1.82516900  |
| C | -3.92885800 | -4.02300800 | 1.08987900  | -3.93671800 | -4.03466100 | 1.04406500  |
| H | -4.44495200 | -4.91708400 | 1.41777500  | -4.45838000 | -4.93041900 | 1.35851500  |
| C | -4.24142300 | -3.39617000 | -0.10800000 | -4.23586000 | -3.39752600 | -0.15223600 |
| C | -3.59744800 | -2.24694100 | -0.54508200 | -3.58434800 | -2.24665300 | -0.57289800 |
| H | -3.90727200 | -1.81409000 | -1.48988600 | -3.88000400 | -1.80116800 | -1.51602800 |
| F | -2.62727500 | -4.06360400 | 3.01279800  | -2.65623200 | -4.09704700 | 2.98064000  |
| F | -5.20389400 | -3.92427100 | -0.86621200 | -5.19174100 | -3.91698900 | -0.92340800 |
| N | -2.59810600 | 0.40059000  | -1.88930600 | -2.54330900 | 0.39472400  | -1.87495200 |
| C | -3.69687300 | 1.18690400  | -1.70576100 | -3.69127800 | 1.22103100  | -1.68163500 |
| C | -4.49435300 | 1.52524000  | -2.80708100 | -4.48887200 | 1.56620800  | -2.82531200 |
| H | -5.36592300 | 2.14635400  | -2.65804000 | -5.36396500 | 2.18280900  | -2.67266600 |
| C | -4.17033100 | 1.05431300  | -4.06859300 | -4.15993400 | 1.12088800  | -4.07083100 |
| H | -4.79377000 | 1.31264700  | -4.91941000 | -4.76890200 | 1.38012900  | -4.93015600 |
| C | -3.04891400 | 0.24353900  | -4.23161600 | -3.00734500 | 0.29674100  | -4.22489200 |
| H | -2.76637700 | -0.15505900 | -5.19963600 | -2.71194600 | -0.08985600 | -5.19354300 |
| C | -2.29309800 | -0.05708300 | -3.11335700 | -2.25481800 | -0.02858500 | -3.10252100 |
| H | -1.41918500 | -0.69584300 | -3.17104600 | -1.38573100 | -0.67339800 | -3.18696100 |
| C | -2.97636100 | 1.05298500  | 0.61674700  | -2.93858500 | 1.04632000  | 0.63513500  |
| C | -3.91174900 | 1.57361600  | -0.31887400 | -3.90173800 | 1.57699000  | -0.35277600 |
| C | -4.94827400 | 2.39191000  | 0.14806200  | -4.96921100 | 2.40607800  | 0.15143200  |
| C | -5.09944000 | 2.71519700  | 1.48254700  | -5.10600400 | 2.69788100  | 1.47198700  |
| H | -5.91259400 | 3.34811800  | 1.81665100  | -5.91954300 | 3.32348700  | 1.82150700  |
| C | -4.17148800 | 2.18837900  | 2.37093800  | -4.16562900 | 2.16050000  | 2.38268700  |
| C | -3.12271600 | 1.37279600  | 1.96681600  | -3.10877000 | 1.35077700  | 1.97630300  |
| H | -2.44285200 | 0.99416600  | 2.72226000  | -2.43611100 | 0.96439300  | 2.73464300  |
| F | -5.84352400 | 2.90470200  | -0.70998600 | -5.86031000 | 2.91417900  | -0.71211900 |
| F | -4.29665100 | 2.48590300  | 3.66428300  | -4.31351300 | 2.46101200  | 3.67115900  |
